# Supplementary material
Source: publisher figshare collection journal article supplement (https://acs.figshare.com/ndownloader/files/3781357)
Supplement: Supplementary file 1 [file 3781357]

*Supporting Information for*

**Efficient Electrochemical CO<sub>2</sub> Conversion Powered by Renewable Energy**

Douglas R. Kauffman,<sup>1,\*</sup> Jay Thakkar,<sup>1</sup> Rajan Siva,<sup>1</sup> Christopher Matranga,<sup>1</sup> Paul R. Ohodnicki,<sup>1</sup>  
Chenjie Zeng<sup>2</sup> and Rongchao Jin<sup>2</sup>

<sup>1</sup>National Energy Technology Laboratory, United States Department of Energy, Pittsburgh, Pennsylvania, USA. \*Email: Douglas.Kauffman@NETL.DOE.GOV

<sup>2</sup>Dept. of Chemistry, Carnegie Mellon University, Pittsburgh, Pennsylvania, USA

| <b>Contents</b>                                                                                                                                                                           | <b>Pages</b> |
|-------------------------------------------------------------------------------------------------------------------------------------------------------------------------------------------|--------------|
| <b>Experimental</b> .....                                                                                                                                                                 | S2-S3        |
| <b>Equation S1.</b> Faradaic efficiency (FE) calculation.....                                                                                                                             | S4           |
| <b>Equations S2-S5.</b> Required electrical input for CO <sub>2</sub> Reduction Reaction (CO <sub>2</sub> RR).....                                                                        | S5           |
| <b>Table S1.</b> Ideal Energy requirements (MWh/tonne CO <sub>2</sub> ) for converting CO <sub>2</sub> into various products at zero overpotential and 100% Faradaic efficiency (FE)..... | S6           |
| <b>Table S2.</b> Energy requirements (MWh/tonne CO <sub>2</sub> ) for selected catalyst systems to convert one tonne CO <sub>2</sub> in to various products.....                          | S7           |
| <b>Figure S1.</b> Electron Microscopy of Au <sub>25</sub> /CB electrodes.....                                                                                                             | S8           |
| <b>Figure S2.</b> CO <sub>2</sub> RR product distribution from catalyst-free carbon electrodes.....                                                                                       | S9           |
| <b>Figure S3.</b> Potential-Dependent CO <sub>2</sub> reduction at Au <sub>25</sub> /CB electrode.....                                                                                    | S10          |
| <b>Figure S4.</b> CO <sub>2</sub> flow rate-dependent CO <sub>2</sub> reduction at Au <sub>25</sub> /CB electrode.....                                                                    | S11          |
| <b>Figure S5.</b> Post-reaction TEM of Au <sub>25</sub> /CB after 36 hours of electrolysis.....                                                                                           | S12          |
| <b>Figure S6.</b> XPS of Au <sub>25</sub> /CB electrode before and after 36 hours of electrolysis.....                                                                                    | S13          |
| <b>Figure S7.</b> Raw CO <sub>2</sub> reduction current over 36 hours at Au <sub>25</sub> /CB electrode.....                                                                              | S14          |
| <b>Figure S8.</b> Photograph of the solar-rechargeable battery.....                                                                                                                       | S15          |
| <b>References</b> .....                                                                                                                                                                   | S16-S17      |

## Experimental Section

**General.**  $\text{Au}_{25}(\text{C}_2\text{H}_4\text{Ph})_{18}$  nanoclusters were synthesized following previously published methods.<sup>1,2</sup> Absorbance spectroscopy was conducted on an Agilent 8453 diode array spectrophotometer. All electrochemical experiments were conducted in 0.1M  $\text{KHCO}_3$  using a Ag/AgCl reference electrode and a Pt mesh counter electrode. The Ag/AgCl reference electrode was regularly calibrated against a Hydroflex reversible hydrogen electrode in  $\text{CO}_2$  saturated 0.1M  $\text{KHCO}_3$ . Purified water (17-18  $\text{M}\Omega$ , Barnstead Easypure) was used to prepare all aqueous solutions and to clean all glassware. A Basi Epsilon potentiostat was used for potentiostat-controlled experiments. A 6V, 1.5W solar panel (RadioShack; model 2770052) was used for solar cell-powered experiments. A rechargeable 6V battery (Universal Power Group; model UB645k) was charged with a 6V solar charger (American Hunter; Model BL-66-S) and used for battery-powered experiments.

**Electrode Preparation.** A small amount of  $\text{Au}_{25}$  was dissolved in 3 mL acetone and the UV-Vis absorbance spectrum was collected in a 1 cm quartz cuvette. The concentration of  $\text{Au}_{25}$  ( $\text{mol L}^{-1}$ ) was determined using the known molar absorptivity at 670 nm ( $8800 \text{ L mol}^{-1} \text{ cm}^{-1}$ ).<sup>3</sup> Specific electrode loadings were obtained by mixing precise volumes of  $\text{Au}_{25}$  solution with 2 mg of carbon black (CB) dispersed in 2 mL methanol. The mixture was sonicated for approximately 1 minute to ensure complete mixing.  $\text{Au}_{25}$  is not soluble in methanol and this process precipitates  $\text{Au}_{25}$  onto the CB support. The mixture was diluted with ultrapure water and centrifuged twice to remove the methanol. The centrifuged  $\text{Au}_{25}$ /CB material was dried under  $\text{N}_2$  and then suspended in 2 ml  $\text{H}_2\text{O}$  by adding 75  $\mu\text{L}$  Nafion solution and sonicating. The resulting  $\text{Au}_{25}$ /CB suspension was dropcast onto 25  $\text{cm}^2$  carbon paper electrodes heated at 135 C. This temperature was high

enough to evaporate water but lower than the  $\sim 200$  C required for ligand desorption.<sup>4</sup> The Au<sub>25</sub>/CB material occupied approximately 13 cm<sup>2</sup> of the electrode surface, and the edges of the carbon paper electrodes remained bare.

**Reactor Design and Operation.** A continuous flow, glass reactor was used to study the electrocatalytic reduction of CO<sub>2</sub>. The reactor was an H-cell design constructed from two 150 mL chambers (Addams & Chittenden Scientific Glassware; microbial fuel cell model 100.25.3). The cathode chamber contained the Au<sub>25</sub>/CB coated carbon paper electrode and a Ag/AgCl reference electrode. The anode half-cell compartment contained the platinum mesh counter electrode. The two chambers were separated by a 0.007 inch thick Nafion 117 cation exchange membrane. Ultrahigh purity CO<sub>2</sub> (UHP; 99.999%) was continuously purged at a constant rate through the cathode compartment electrolyte. A constant potential was applied to the cathode with a potentiostat, solar cell or solar-rechargeable battery. The effluent gas was collected in a gas-tight 1 liter Tedlar bag (Supelco) and products were quantified using a Perkin Elmer Arnel Clarus 600 gas chromatograph (GC). The GC was equipped with a 15' x 1/8" (2.1 mm inner diameter) Supelco 60/80 Carboxen 1000 column. The GC was calibrated with a multi-component standard gas mixture containing certified concentrations of H<sub>2</sub>, N<sub>2</sub>, O<sub>2</sub>, CO, CO<sub>2</sub>, and CH<sub>4</sub>. The mixture was balanced with He. Each calibration point was conducted in triplicate to ensure reproducibility. The column can also detect other common CO<sub>2</sub> reduction products including acetylene, ethane, ethylene and methanol, but we only detected CO and H<sub>2</sub>. Faradaic efficiency calculations show that the detected products (CO and H<sub>2</sub>) account for  $\sim 100\%$  of the electrochemical current, which provides further evidence that our product analysis is accurate. These result is consistent with previous work by our group and others that Au species selectivity

convert CO<sub>2</sub> into CO.<sup>5-9</sup> The anode compartment electrolyte was purged with N<sub>2</sub> and continuously exchanged from a larger 1 liter reservoir with peristaltic pumps.

**Faradaic Efficiency.** Faradaic efficiency (FE) estimates the fraction of electrons used in the CO<sub>2</sub>RR. Ideally, all electrons passed through the electrode are used in the CO<sub>2</sub>RR reaction and the system shows 100% FE. FE values were calculated from the detected reaction products and the integrated electrolysis charge. In a continuous flow reactor the amount of products contained in the effluent gas *per* unit time can be determined from the flow rate, sampling time, and GC injection volume. For example, we collected 500 mL of effluent gas in a sampling bag every 10 minutes (50 mL min<sup>-1</sup> flow rate). We injected 0.5 mL of this gas into the GC to quantify the amount of products. The GC injection volume was 1/1000<sup>th</sup> the sample volume, so the detected products represented 1/1000<sup>th</sup> the total amount of gas produced during the 10 min sampling period. Faradaic efficiencies were then determined from the amount of charge passed during the sampling period. FE values for multi-hour and multi-day runs were calculated from the average daily charge per minute passing through the cathode.

**Equation S1.** Faradaic Efficiency Calculation.

$$\text{FE (\%)} = \frac{\text{Detected Products (mol CO)} \times \frac{2 \text{ mol e}^-}{\text{mol CO}}}{\frac{\text{Electrolysis Charge (C)}}{96485 \frac{\text{C}}{\text{mol e}^-}}} = \frac{\text{mol e}^- \text{ consumed by products}}{\text{mol e}^- \text{ passed through electrode}}$$

**Calculating the electrical input required for CO<sub>2</sub> Conversion.** The electrical input (MWh) that is required to convert one metric tonne (1000 kg) of CO<sub>2</sub> into CO (or any other product) can be calculated as follows:

**Equation S2.** One metric tonne (1000 kg) CO<sub>2</sub> is equal to 22727.3 mol CO<sub>2</sub>.

$$1 \text{ tonne CO}_2 \left( \frac{1000 \text{ kg}}{\text{tonne}} \right) \left( \frac{\text{mol CO}_2}{0.044 \text{ kg}} \right) = 22727.3 \text{ mol CO}_2$$

**Equation S3.** 4.3857x10<sup>9</sup> Coulombs of charge are required to convert 22727.3 mol CO<sub>2</sub> into CO (2 e<sup>-</sup> process) assuming 100% Faradaic efficiency (FE).

$$22727.3 \text{ mol CO}_2 \left( \frac{2 \text{ e}^-}{\text{CO}_2} \right) \left( \frac{96485 \text{ C}}{\text{mol e}^-} \right) \left( \frac{1}{100\% \text{ FE}} \right) = 4.3857 \times 10^9 \text{ C}$$

**Equation S4.** 3600 C are equivalent to 1 ampere hour (Ah).

$$4.3857 \times 10^9 \text{ C} \left( \frac{\text{A} \cdot \text{s}}{\text{C}} \right) \left( \frac{\text{h}}{3600 \text{ s}} \right) = 1.2182 \times 10^6 \text{ Ah}$$

**Equation S5.** Electricity is typically reported in units of watt hours (W = A·V). The formal potentials for CO formation and water oxidation are -0.106V and +1.23 V vs RHE, respectively. At zero overpotential (η=0V) the total cell voltage would be 1.336 V and it would require 1.628 MWh of electricity to convert one tonne of CO<sub>2</sub> into CO. Energy requirements for additional products and non-ideal, real-world systems are summarized in tables S1 and S2.

$$1.2182 \times 10^6 \text{ Ah} * 1.336 \text{ V} \left( \frac{\text{W}}{\text{A} \cdot \text{V}} \right) = 1.628 \text{ MWh}$$

**Table S1.** Ideal Energy requirements (MWh/tonne CO<sub>2</sub>) for converting CO<sub>2</sub> into various products at zero overpotential and 100% Faradaic efficiency (FE). Values were calculated using equations S1-S4.

| Product                       | ne <sup>-</sup> | FE (%) | Cathode Voltage (V vs. RHE) | Anode Voltage (V vs. RHE) | Total Cell Voltage (V) | Overpotential "η" (V) | MWh / tonne CO <sub>2</sub> |
|-------------------------------|-----------------|--------|-----------------------------|---------------------------|------------------------|-----------------------|-----------------------------|
| CO                            | 2               | 100    | -0.106                      | 1.23                      | 1.34                   | 0                     | 1.628                       |
| HCOOH                         | 2               | 100    | -0.250                      | 1.23                      | 1.41                   | 0                     | 1.803                       |
| HCHO                          | 4               | 100    | -0.070                      | 1.23                      | 1.38                   | 0                     | 3.167                       |
| CH <sub>3</sub> OH            | 6               | 100    | 0.016                       | 1.23                      | 1.23                   | 0                     | 4.437                       |
| CH <sub>4</sub>               | 8               | 100    | 0.169                       | 1.23                      | 1.06                   | 0                     | 5.170                       |
| C <sub>2</sub> H <sub>4</sub> | 12              | 100    | 0.064                       | 1.23                      | 1.16                   | 0                     | 8.523                       |

**Table S2.** Energy requirements (MWh/tonne CO<sub>2</sub>) for selected catalyst systems to convert one tonne CO<sub>2</sub> in to various products. We assumed 500 mV overpotential for anodic OER and all voltages are in the RHE scale.

| Sample                             | Product                       | FE    | Cathode Voltage | Anode Voltage | Cell Voltage | MWh /<br>tonne CO <sub>2</sub> | Ref.             |
|------------------------------------|-------------------------------|-------|-----------------|---------------|--------------|--------------------------------|------------------|
| Au <sub>25</sub>                   | CO                            | 0.99  | -1              | 1.73          | 2.73         | 3.36                           | 5,6              |
| Au <sub>25</sub>                   | CO                            | 0.87  | -1              | 1.73          | 2.73         | 3.82                           | <i>This work</i> |
| 4nm Au NP                          | CO                            | 0.90  | -0.9            | 1.73          | 2.63         | 5.17                           | 7                |
| 6 nm Au NP                         | CO                            | 0.71  | -0.9            | 1.73          | 2.63         | 4.51                           | 7                |
| 8 nm Au NP                         | CO                            | 0.71  | -0.9            | 1.73          | 2.63         | 4.51                           | 7                |
| 10 nm Au NP                        | CO                            | 0.89  | -0.9            | 1.73          | 2.63         | 3.60                           | 7                |
| Au NWs                             | CO                            | 0.9   | -0.55           | 1.73          | 2.28         | 3.09                           | 8                |
| Au-oxide NPs                       | CO                            | 0.99  | -0.5            | 1.73          | 2.23         | 2.74                           | 9                |
| CuOx NPs                           | CO                            | 0.61  | -1.0            | 1.73          | 2.43         | 5.45                           | 10               |
| Ag                                 | CO                            | 0.99  | n/a             | n/a           | 2.5          | 3.08                           | 11               |
| Ag/CN                              | CO                            | 0.90  | -1.15           | 1.73          | 2.88         | 3.90                           | 12               |
| Bulk CuOx                          | CO +<br>HCOOH                 | 0.69  | -0.5            | 1.73          | 2.23         | 3.94                           | 13               |
| SnO <sub>2</sub>                   | CO +<br>HCOOH                 | 0.99  | -0.7            | 1.73          | 2.43         | 2.99                           | 14               |
| PbO <sub>2</sub>                   | HCOOH                         | 1     | -0.75           | 1.73          | 2.48         | 3.02                           | 15               |
| 5nm SnO <sub>2</sub><br>NPs        | HCOOH                         | 0.86  | -1.6            | 1.73          | 3.33         | 4.72                           | 16               |
| PEI-NCNT                           | HCOOH                         | .85   | -1.19           | 1.73          | 2.92         | 4.19                           | 17               |
| Boron-doped<br>diamond             | HCOH                          | 0.62  | -0.877          | 1.73          | 2.607        | 10.25                          | 18               |
| RuO <sub>2</sub>                   | CH <sub>3</sub> OH            | 0.6   | -0.6            | 1.73          | 2.33         | 14.19                          | 19               |
| Cu-oxide                           | CH <sub>3</sub> OH            | 0.38  | -0.5            | 1.73          | 2.23         | 21.45                          | 20               |
| Mo                                 | CH <sub>3</sub> OH            | 0.5   | -0.364          | 1.73          | 2.094        | 15.31                          | 20               |
| RuO <sub>2</sub> -TiO <sub>2</sub> | CH <sub>3</sub> OH            | 0.46  | -0.364          | 1.73          | 2.094        | 16.64                          | 20               |
| Cu                                 | CH <sub>4</sub>               | 0.723 | -1.05           | 1.73          | 2.78         | 18.74                          | 21               |
| Cu NPs                             | CH <sub>4</sub>               | 0.77  | -1.35           | 1.73          | 3.08         | 19.49                          | 22               |
| Bulk Cu                            | C <sub>2</sub> H <sub>4</sub> | 0.481 | -1.052          | 1.73          | 2.782        | 42.28                          | 20               |
| Bulk Cu                            | C <sub>2</sub> H <sub>4</sub> | 0.5   | -0.927          | 1.73          | 2.657        | 38.84                          | 23               |

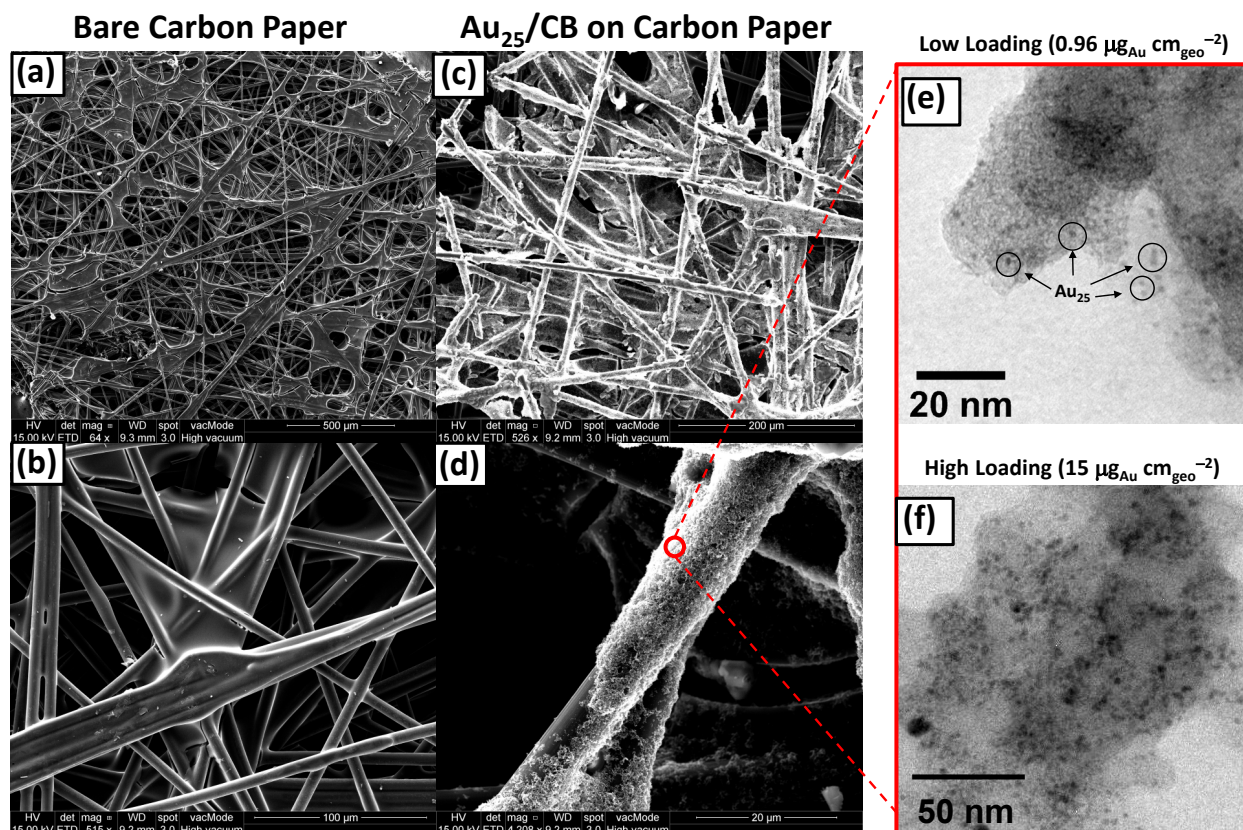

**Figure S1.** Scanning electron microscope images of (a,b) a bare carbon paper electrode and (c,d)  $\text{Au}_{25}/\text{CB}$  deposited onto a carbon paper electrode. (e,f) Transmission electron microscope (TEM) images showing well dispersed  $1.4 \pm 0.4$  nm  $\text{Au}_{25}$  particles in the low loading regime ( $0.96 \mu\text{g}_{\text{Au}} \text{cm}^{-2}$ ) and aggregated  $\text{Au}_{25}$  particles in the high and loading regime ( $15 \mu\text{g}_{\text{Au}} \text{cm}^{-2}$ ).  $\text{Au}_{25}/\text{CB}$  samples were scraped from the surface of the electrode, sonicated in methanol, and then deposited onto lacey carbon grids for TEM imaging.



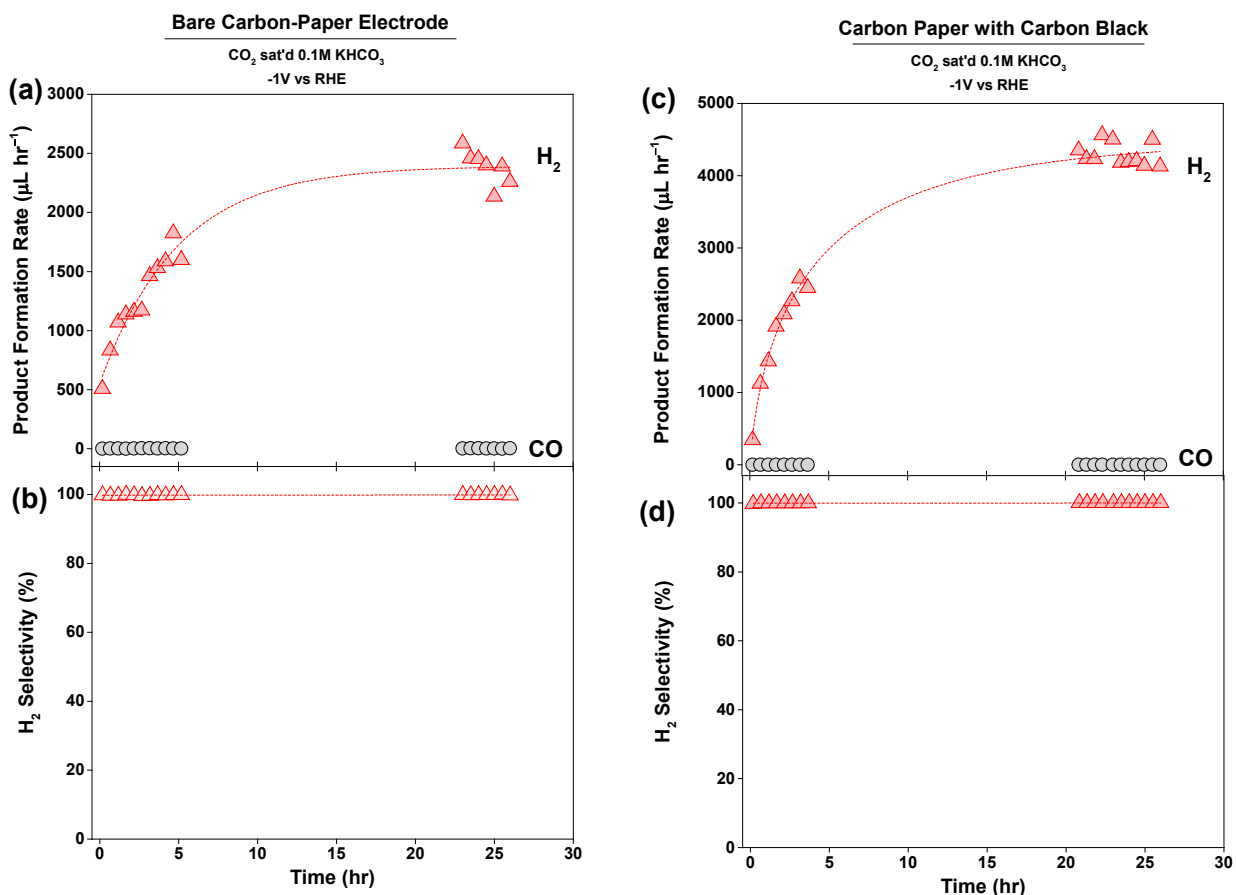

**Figure S2.** Product formation rates ( $\mu\text{L hr}^{-1}$ ) and  $\text{H}_2$  selectivity for (a,b) a bare carbon paper electrode ( $99.8 \pm 0.1\%$   $\text{H}_2$  selectivity) and (c,d) carbon black on carbon paper electrode ( $99.95 \pm 0.06\%$   $\text{H}_2$  selectivity) operated at  $-1\text{V vs. RHE}$  in  $0.1\text{M KHCO}_3$  bubbled with  $\text{CO}_2$  at  $50 \text{ mL min}^{-1}$ . Both electrodes showed selective  $\text{H}_2$  evolution that increased over time; dashed lines serve as a guide for the eye. Increased  $\text{H}_2$  evolution over time likely stems from the electrolyte slowly wetting the finely woven carbon paper electrode.

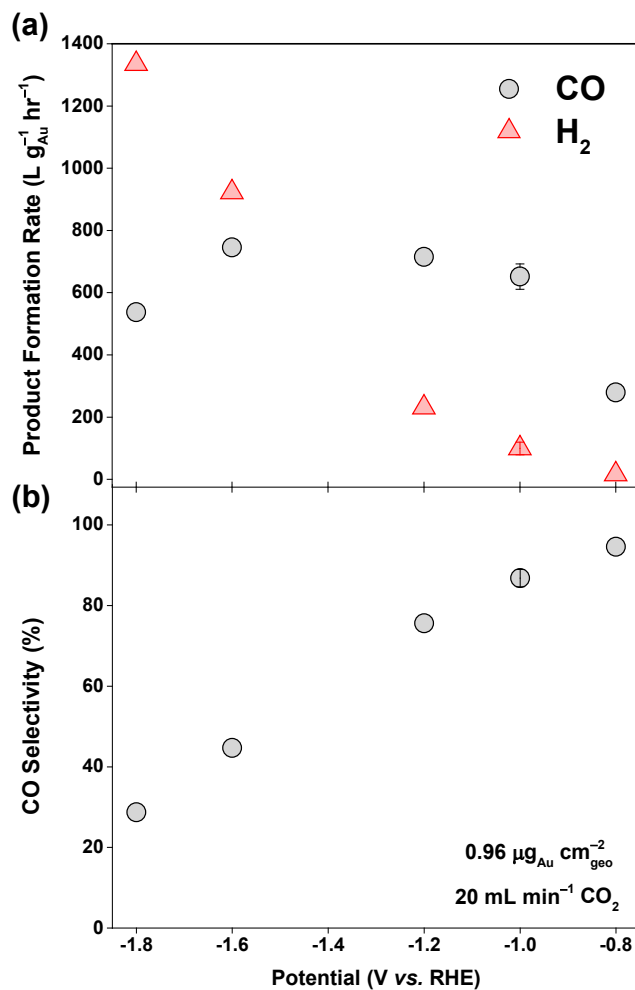

**Figure S3.** (a) Product formation rates and (b) CO selectivity for an Au<sub>25</sub>-containing electrode as a function of applied potential in CO<sub>2</sub> saturated 0.1M KHCO<sub>3</sub>. Catalyst loading was 0.96  $\mu\text{g}_{\text{Au}} \text{cm}_{\text{geo}}^{-2}$  and the CO<sub>2</sub> flow rate was 20  $\text{mL min}^{-1}$ .

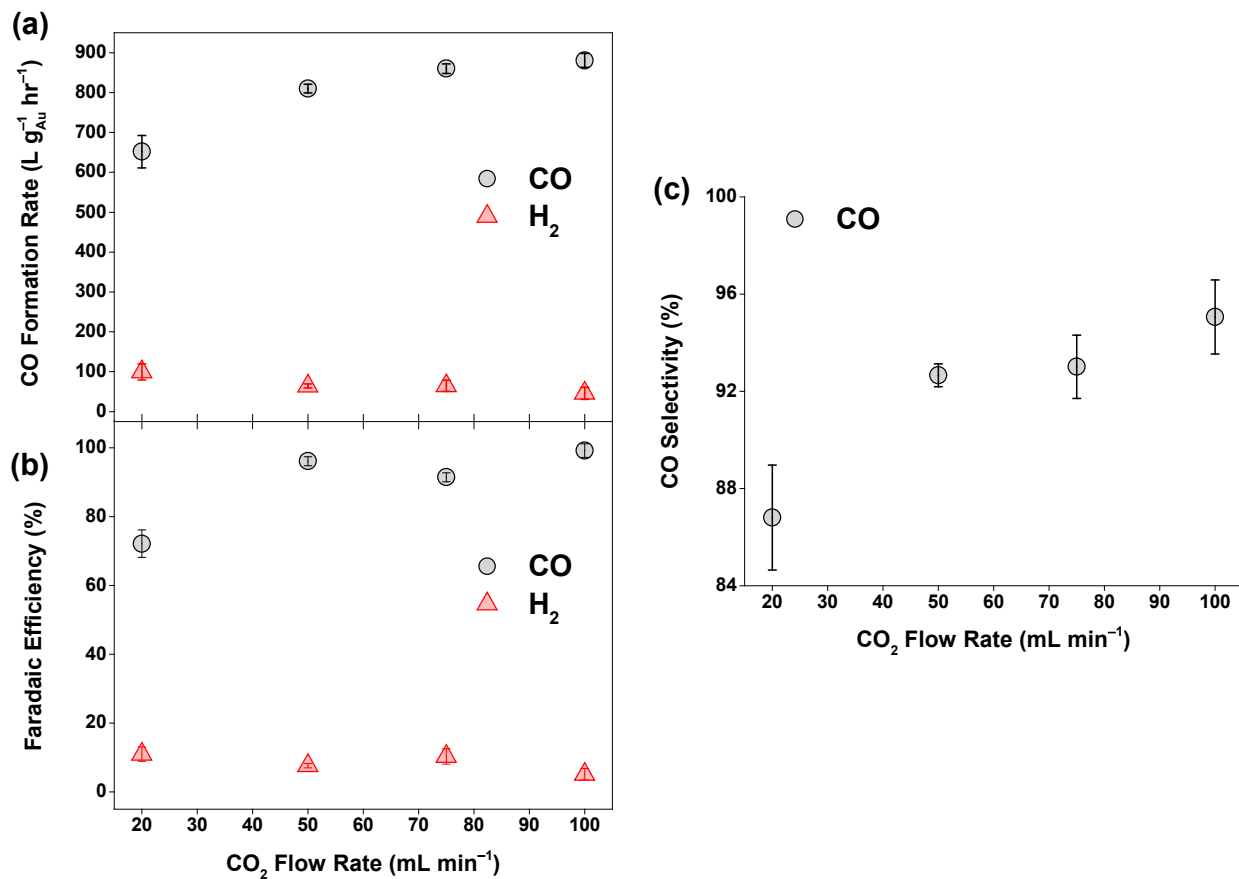

**Figure S4.** (a) Product formation rates, (b) Faradaic efficiency and (c) CO selectivity as a function of CO<sub>2</sub> flow rate (mL min<sup>-1</sup>) in 0.1M KHCO<sub>3</sub>. Catalyst loading was 0.96 μg<sub>Au</sub> cm<sub>geo</sub><sup>-2</sup> and the cathode potential was -1V vs. RHE.

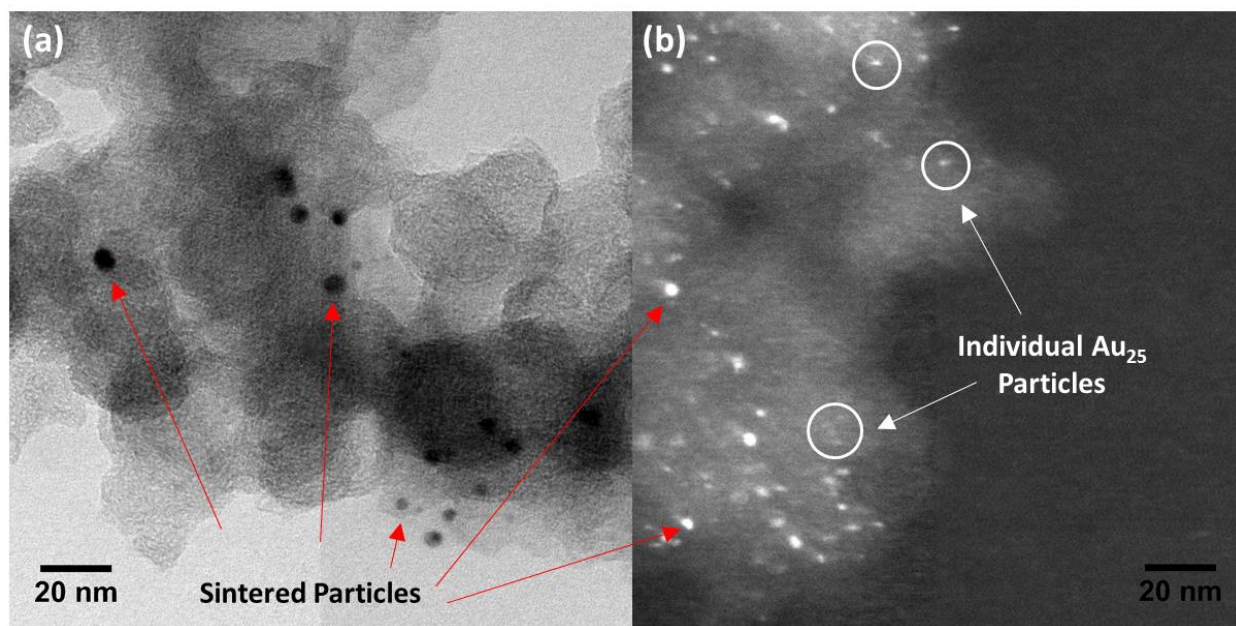

**Figure S5.** (a) Brightfield and (b) darkfield TEM images of Au<sub>25</sub>/CB after 36 hours of CO<sub>2</sub> electrolysis at  $-1\text{ V}$  vs RHE. The TEM images show larger sintered particles and some individual Au<sub>25</sub> particles after 36 hours of electrolysis. White circles highlight some of the individual Au<sub>25</sub> particles in panel b.

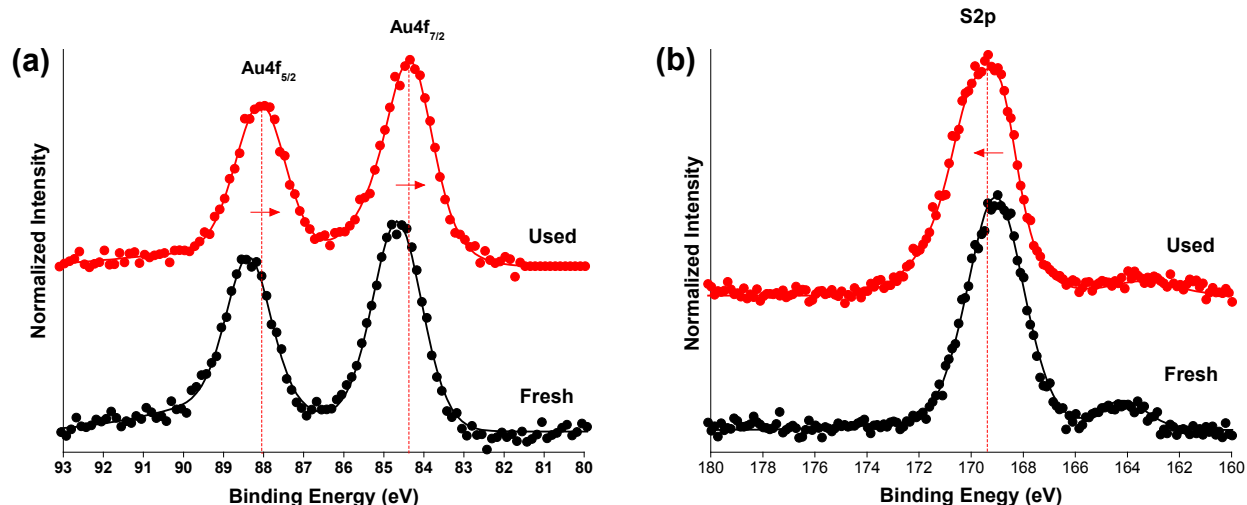

**Figure S6.** X-ray photoelectron spectroscopy (XPS) of the Au4f (a) and S2p (b) spectral regions before (black) and after (red) 36 hours of CO<sub>2</sub> electrolysis.

A downshift in the Au<sub>4f</sub> binding energy combined with an upshift in S2p binding energy suggests some particle sintering and/or thiolate desorption from the Au<sub>25</sub> nanocluster after extended electrolysis. Specifically, desorption of the electron-withdrawing ligands should return some electron density to the Au nanocluster and induce a downshift in Au 4f binding energy. Furthermore, desorption of thiol groups from Au surfaces produces an upshift in S2p binding energy.<sup>24</sup> Ligand desorption can lead to particle sintering, which provides an explanation for the increased post-reaction particle sizes shown in Figure S5.

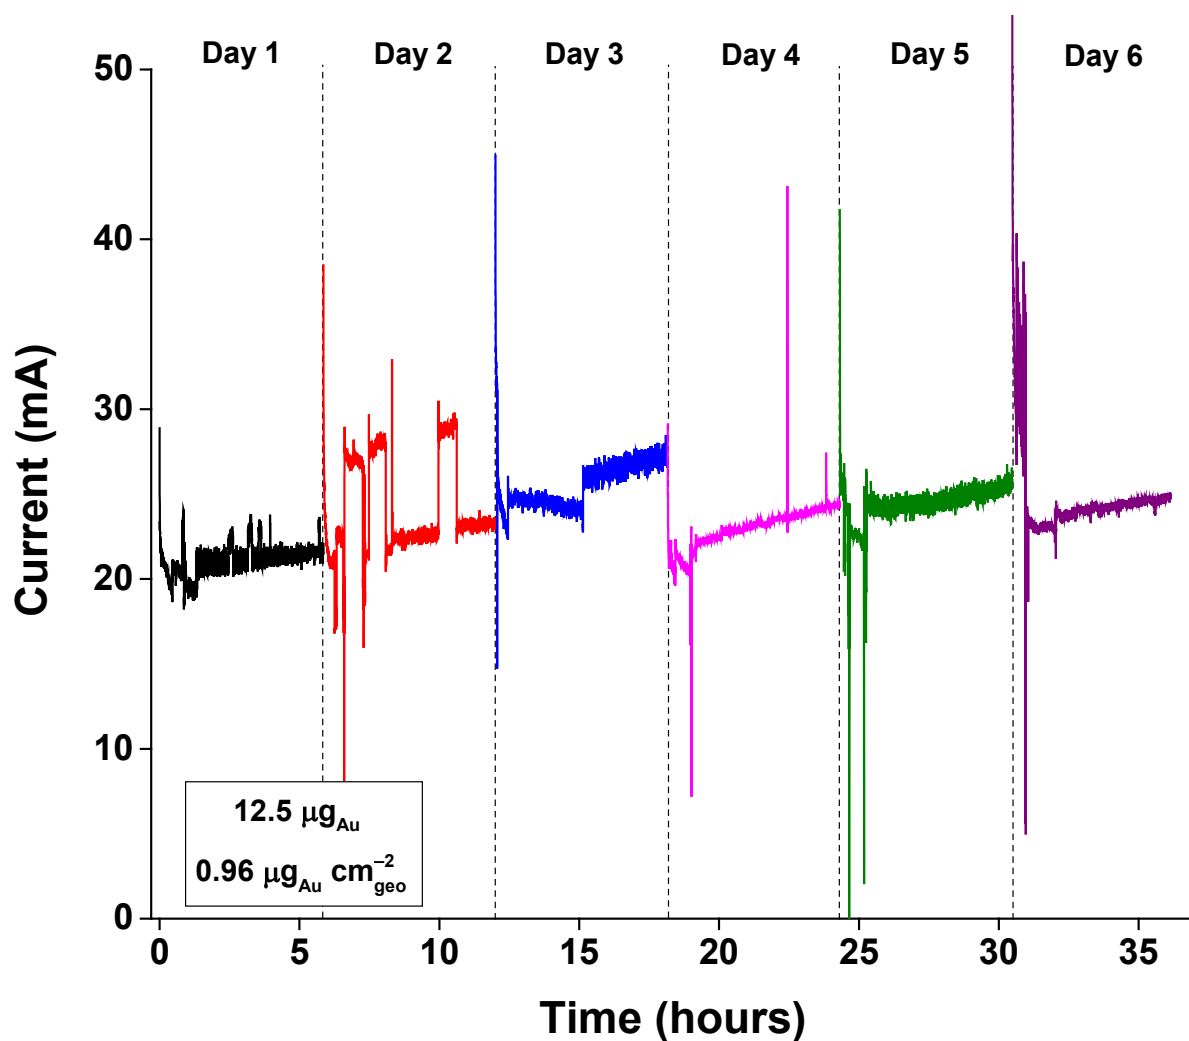

**Figure S7.** Day-to-day CO<sub>2</sub>RR current in 0.1M KHCO<sub>3</sub> bubbled with CO<sub>2</sub> at 50 mL min<sup>-1</sup>. The electrode was operated at -1V vs RHE and it contained 0.96  $\mu\text{g}_{\text{Au}} \text{ cm}_{\text{geo}}^{-2}$  (12.5  $\mu\text{g}$  total Au loading).

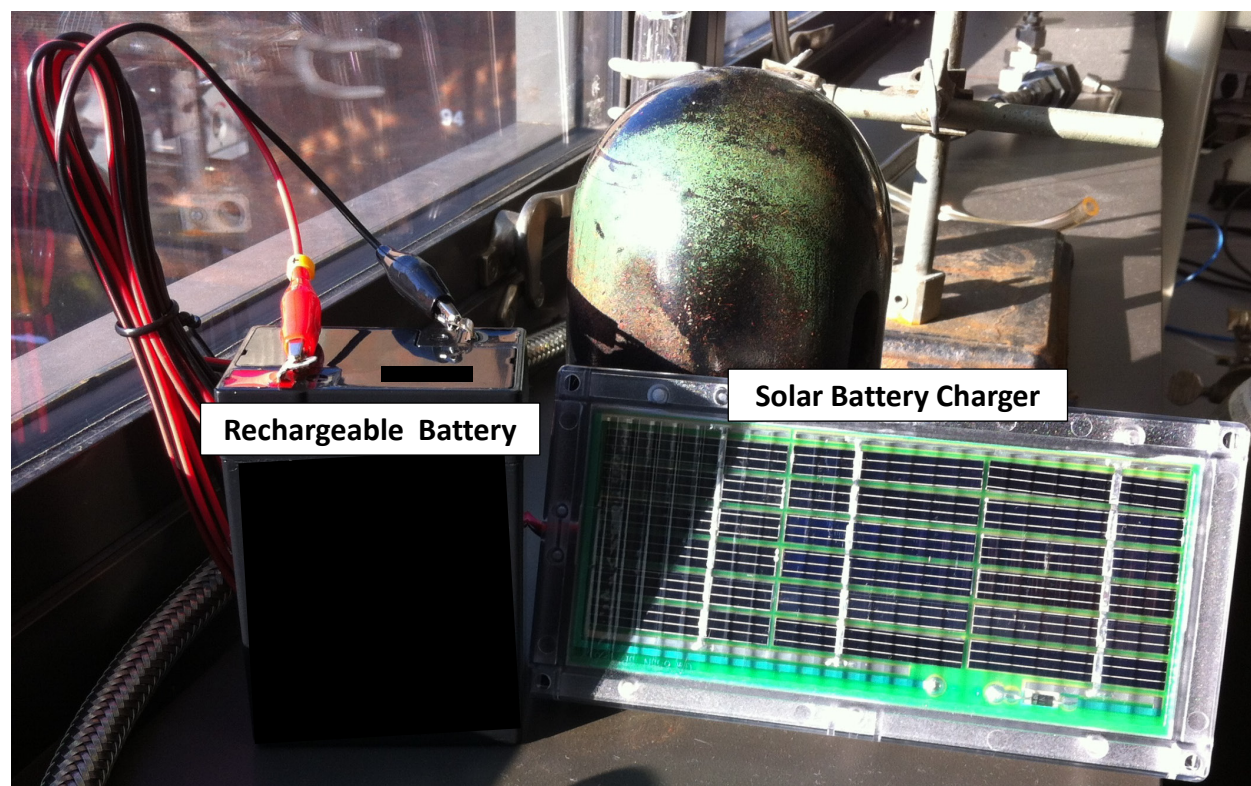

**Figure S8.** Photograph of solar-rechargeable battery.

## REFERENCES

1. Zhu, M.; Aikens, C. M.; Hollander, F. J.; Schatz, G. C.; Jin, R. Correlating the Crystal Structure of a Thiol-Protected Au<sub>25</sub> Cluster and Optical Properties. *J. Am. Chem. Soc.* **2008**, *130*, 5883-5885.
2. Heaven, M. W.; Dass, A.; White, P. S.; Holt, K. M.; Murray, R. W. Crystal Structure of the Gold Nanoparticle [N(C<sub>8</sub>H<sub>17</sub>)<sub>4</sub>][Au<sub>25</sub>(SCH<sub>2</sub>CH<sub>2</sub>Ph)<sub>18</sub>]. *J. Am. Chem. Soc.* **2008**, *130*, 3754-3755.
3. Negishi, Y.; Nobusada, K.; Tsukuda, T. Glutathione-Protected Gold Clusters Revisited: Bridging the Gap between Gold(I)-Thiolate Complexes and Thiolate-Protected Gold Nanocrystals. *J. Am. Chem. Soc.* **2005**, *127*, 5261-5270.
4. Nie, X.; Qian, H.; Ge, Q.; Xu, H.; Jin, R. CO Oxidation Catalyzed by Oxide-Supported Au<sub>25</sub>(SR)<sub>18</sub> Nanoclusters and Identification of Perimeter Sites as Active Centers. *ACS Nano* **2012**, *6*, 6014-6022.
5. Kauffman, D. R.; Alfonso, D.; Matranga, C.; Ohodnicki, P.; Deng, X.; Siva, R. C.; Zeng, C.; Jin, R. Probing active site chemistry with differently charged Au<sub>25</sub><sup>q</sup> nanoclusters (q = -1, 0, +1). *Chem. Sci.* **2014**, *5*, 3151-3157.
6. Kauffman, D. R.; Alfonso, D.; Matranga, C.; Qian, H.; Jin, R. Experimental and Computational Investigation of Au<sub>25</sub> Clusters and CO<sub>2</sub>: A Unique Interaction and Enhanced Electrocatalytic Activity. *J. Am. Chem. Soc.* **2012**, *134*, 10237-10243.
7. Zhu, W.; Michalsky, R.; Metin, O. n.; Lv, H.; Guo, S.; Wright, C. J.; Sun, X.; Peterson, A. A.; Sun, S. Monodisperse Au Nanoparticles for Selective Electrocatalytic Reduction of CO<sub>2</sub> to CO. *J. Am. Chem. Soc.* **2013**, *135*, 16833-16836.
8. Zhu, W.; Zhang, Y.-J.; Zhang, H.; Lv, H.; Li, Q.; Michalsky, R.; Peterson, A. A.; Sun, S. Active and Selective Conversion of CO<sub>2</sub> to CO on Ultrathin Au Nanowires. *J. Am. Chem. Soc.* **2014**, *136*, 16132-16135.
9. Chen, Y.; Li, C. W.; Kanan, M. W. Aqueous CO<sub>2</sub> Reduction at Very Low Overpotential on Oxide-Derived Au Nanoparticles. *J. Am. Chem. Soc.* **2012**, *134*, 19969-19972.
10. Kauffman, D. R.; Ohodnicki, P. R.; Kail, B. W.; Matranga, C. Selective Electrocatalytic Activity of Ligand Stabilized Copper Oxide Nanoparticles.pdf. *J. Phys. Chem. Lett.* **2011**, *2*, 2038-2043.
11. Rosen, B. A.; Salehi-Khojin, A.; Thorson, M. R.; Zhu, W.; Whipple, D. T.; Kenis, P. J. A.; Masel, R. I. Ionic Liquid-Mediated Selective Conversion of CO<sub>2</sub> to CO at Low Potentials. *Science* **2011**, *334*, 643-644.
- R.; Ma, S.; Gewirth, A. A.; Kenis, P. J. A. Nitrogen-Based Catalysts for the Electrochemical Reduction of CO<sub>2</sub> to CO. *J. Am. Chem. Soc.* **2012**, *134*, 19520-19523.



13. Li, C. W.; Kanan, M. W. CO<sub>2</sub> Reduction at Low Overpotential on Cu Electrodes Resulting from the Reduction of Thick Cu<sub>2</sub>O Films. *J. Am. Chem. Soc.* **2012**, *134*, 7231-7234.
14. Chen, Y.; Kanan, M. W. Tin Oxide Dependence of the CO<sub>2</sub> Reduction Efficiency on Tin Electrodes and Enhanced Activity for Tin/Tin Oxide Thin-Film Catalysts. *J. Am. Chem. Soc.* **2012**, *134*, 1986-1989.
15. Lee, C. H.; Kanan, M. W. Controlling H<sup>+</sup> vs CO<sub>2</sub> Reduction Selectivity on Pb Electrodes. *ACS Catal.* **2014**, *5*, 465-469.
16. Zhang, S.; Kang, P.; Meyer, T. J. Nanostructured Tin Catalysts for Selective Electrochemical Reduction of Carbon Dioxide to Formate. *J. Am. Chem. Soc.* **2014**, *136*, 1734-1737.
17. Zhang, S.; Kang, P.; Ubnoske, S.; Brennaman, M. K.; Song, N.; House, R. L.; Glass, J. T.; Meyer, T. J. Polyethylenimine-Enhanced Electrocatalytic Reduction of CO<sub>2</sub> to Formate at Nitrogen-Doped Carbon Nanomaterials. *J. Am. Chem. Soc.* **2014**, *136*, 7845-7848.
18. Nakata, K.; Ozaki, T.; Terashima, C.; Fujishima, A.; Einaga, Y. High-Yield Electrochemical Production of Formaldehyde from CO<sub>2</sub> and Seawater. *Angew. Chem. Int. Ed.* **2014**, *53*, 871-874.
19. Herron, J. A.; Kim, J.; Upadhye, A. A.; Huber, G. W.; Maravelias, C. T. A general framework for the assessment of solar fuel technologies. *Energy Environ. Sci.* **2015**, *8*, 126-157.
20. Qiao, J.; Liu, Y.; Hong, F.; Zhang, J. A Review of Catalysts for the Electroreduction of Carbon Dioxide to Produce Low-Carbon Fuels. *Chem. Soc. Rev.* **2014**, *43*, 631-675.
21. Peterson, A. A.; Nørskov, J. K. Activity Descriptors for CO<sub>2</sub> Electroreduction to Methane on Transition-Metal Catalysts. *J. Phys. Chem. Lett.* **2012**, *3*, 251-258.
22. Manthiram, K.; Beberwyck, B. J.; Alivisatos, A. P. Enhanced Electrochemical Methanation of Carbon Dioxide with a Dispersible Nanoscale Copper Catalyst. *J. Am. Chem. Soc.* **2014**, *136*, 13319-13325.
23. Gattrell, M.; Gupta, N.; Co, A. A review of the aqueous electrochemical reduction of CO<sub>2</sub> to hydrocarbons at copper. *J. Electroanal. Chem.* **2006**, *594*, 1-19.
24. Castner, D. G.; Hinds, K.; Grainger, D. W. X-ray Photoelectron Spectroscopy Sulfur 2p Study of Organic Thiol and Disulfide Binding Interactions with Gold Surfaces. *Langmuir* **1996**, *12*, 5083-5086.
